# Supplementary material for: Pseudotachylyte as field evidence for lower crustal earthquakes during the intracontinental Petermann Orogeny (Musgrave Block, Central Australia)
Source: Copernicus journal article supplement (doi:10.5194/se-2017-123), 2017-11-08

Shear fabric

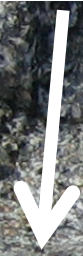

PST

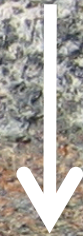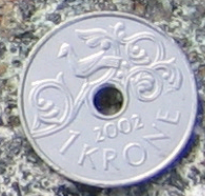

Supplement: Supplementary file [file se-2017-123-RC1-supplement.pdf]
